# Supplementary material for: Prospects of on-chip fuelcell performance: improvement based on numerical simulation
Source: Royal Society of Chemistry journal article supplement (doi:10.1039/c0ee00179a), 2010-10-28
Supplement: c0ee00179a.pdf [file c0ee00179a.pdf]

## Electronic supplementary information

# Prospects of on-chip fuel cell performance: improvement based on numerical simulation

5

Satoshi Tominaka,<sup>1</sup> ‡ Sousuke Ohta,<sup>1</sup> Tetsuya Osaka<sup>1\*</sup> and Richard Alkire<sup>2</sup>

<sup>10</sup> <sup>a</sup>Department of Applied Chemistry, Graduate School of Advanced Science and Engineering, Waseda University, Tokyo 169-8555, Japan.

<sup>b</sup>Department of Chemical & Biomolecular Engineering, University of Illinois, Urbana, IL 61801, USA

<sup>15</sup> ‡Current affiliation: World Premier International (WPI) Research Center for Materials Nanoarchitectonics (MANA), National Institute for Materials Science (NIMS), Namiki 1-1, Tsukuba, Ibaraki 305-0044, Japan. E-mail: TOMINAKA.Satoshi@nims.go.jp

\* E-mail: osakatets@waseda.jp

### **Details on the mesh for the simulation**

#### **Extended mesh**

- Number of degrees of freedom: 124533

#### **Base mesh**

- 5 ● Number of mesh points: 9133
- Number of elements (Triangular): 17856
- Number of boundary elements: 688
- Number of vertex elements: 14
- Minimum element quality 0.5841
- 10 ● Element area ratio 0.0033

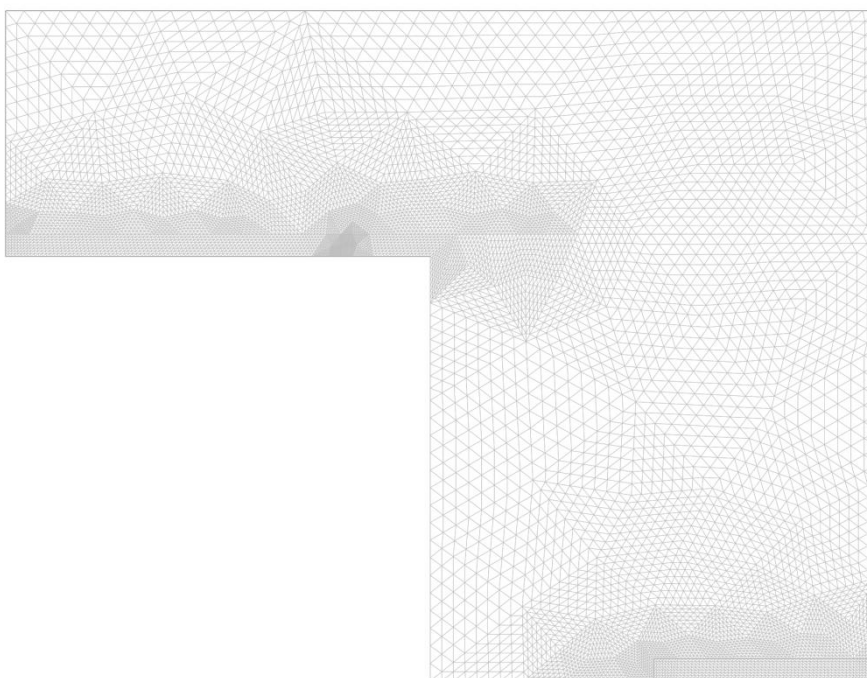

**Figure S1** Created mesh for simulation.

### **Rough estimation of the active area of the PtRu electrode**

We used CO stripping measurements to evaluate electrochemically active surface area of almost the same PtRu electrode, by following the method reported by Takasu *et al.* [Electrochem. Commun. 6 (2004) 480]. The electrode we used for the test was  
5 deposited from a similar deposition solution but containing 2 M HCl. Consequently, the roughness factor, which is defined as the ratio of the electrochemically active surface area to the geometrical one, was calculated as *ca.* 30. By comparing the charge of the CVs of this electrode and the one used in this work scanned in 0.5 M H<sub>2</sub>SO<sub>4</sub> deaerated with N<sub>2</sub>, we roughly estimated the roughness factor of the electrode used in this work as  
10 *ca.* 25 for the latter. Detail data will be submitted in a future paper.

The conditions for the CO stripping voltammetry are as follows. (i) CO was first adsorbed at 0.1 V vs. Ag/AgCl for 40 min in 0.5 M H<sub>2</sub>SO<sub>4</sub> purged with CO gas at 60°C. (ii) The CO gas was removed by bubbling with Ar for 40 min. (iii) Cyclic voltammograms were scanned in the potential range of 0.1 to 0.8 V at 10 mV s<sup>-1</sup>. (iv)  
15 From the stripping charge, electrochemically active surface area was calculated as described the reference [Electrochem. Commun. 6 (2004) 480].
